# Supplementary material for: Associations Between 30-Day Mortality, Specialist Nursing, and Daily Physician Ward Rounds in a National Stroke Registry
Source: PubMed Central journal article supplement (PMC6116797; doi:10.1161/strokeaha.118.021518), 2018-08-07
Supplement: str-49-2155-s001.pdf [file str-49-2155-s001.pdf]

## **SUPPLEMENTAL MATERIAL**

**Association between 30-day stroke mortality, specialist acute stroke nursing and daily physician ward rounds in a comprehensive national stroke registry**

## Supplemental Tables

Table I: 30-day mortality rate for each hospital-level organisational characteristic

|                                                      |                                           | Number of patients<br>Freq | 30-day mortality |        |
|------------------------------------------------------|-------------------------------------------|----------------------------|------------------|--------|
|                                                      |                                           |                            | %                | Freq   |
| Overall                                              |                                           | N=143,578                  | 14.4%            | 20,690 |
| Stroke consultant ward rounds:                       | <7 days a week                            | 60,967                     | 15.4%            | 9,367  |
|                                                      | 7 days a week                             | 82,611                     | 13.7%            | 11,323 |
| Protocols for admission to a stroke unit:            | Not every patient directly admitted       | 54,224                     | 14.5%            | 7,860  |
|                                                      | Every patient directly admitted           | 89,354                     | 14.4%            | 12,830 |
| Stroke consultant posts                              | Some posts unfilled                       | 41,754                     | 14.3%            | 5,952  |
|                                                      | No posts unfilled                         | 101,824                    | 14.5%            | 14,738 |
| Occupational therapist/<br>Physiotherapist staffing: | <7 days per week for both OT and PT       | 87,126                     | 14.7%            | 12,793 |
|                                                      | <7 days for OT and 7 days per week for PT | 10,870                     | 13.0%            | 1,417  |
|                                                      | 7 days per week for both OT and PT        | 45,582                     | 14.2%            | 6,480  |
| Type of beds:                                        | Pre-72h beds only                         | 66,951                     | 13.6%            | 9,085  |
|                                                      | Both pre-72h and mixed beds               | 17,732                     | 14.3%            | 2,540  |
|                                                      | Mixed beds only                           | 58,895                     | 15.4%            | 9,065  |

Table II: Sensitivity analysis including date of discharge

|                                                                           | Odds ratio<br>(95% CI) | p-value |
|---------------------------------------------------------------------------|------------------------|---------|
| Date of discharge:                                                        |                        |         |
| On or before 1 <sup>st</sup> July 2014                                    | Ref: 1.000             |         |
| After 1 <sup>st</sup> July 2014                                           | 0.998 (0.963 – 1.034)  | p=0.910 |
| Daily ward rounds:                                                        |                        |         |
| <7-days per week                                                          | Ref: 1.000             |         |
| 7-days per week                                                           | 0.894 (0.818 – 0.976)  | P=0.013 |
| Average annual number of admissions (100s)                                | <i>Spline</i>          | P=0.166 |
| Ratio of nurses trained in swallow screening per 10 stroke unit beds      | <i>Spline</i>          | P=0.005 |
| Ratio of registered nurses on duty on the weekend per 10 stroke unit beds | <i>Spline</i>          | P=0.125 |

Table III: Sensitivity analysis including interaction between the ratio of swallow trained nurses per 10 acute beds and NIHSS

|                                                                                      | Odds ratio<br>(95% CI) | p-value |
|--------------------------------------------------------------------------------------|------------------------|---------|
| NIHSS                                                                                | 1.102 (1.083 – 1.122)  | P<0.001 |
| Daily ward rounds:                                                                   |                        |         |
| <7-days per week                                                                     |                        |         |
| 7-days per week                                                                      | 0.894 (0.818 – 0.977)  | P<0.013 |
| Interaction between the ratio of swallow trained nurses per 10 acute beds and NIHSS: | <i>Spline</i>          | P=0.067 |
| Average annual number of admissions (100s)                                           | <i>Spline</i>          | P=0.158 |
| Ratio of nurses trained in swallow screening per 10 stroke unit beds                 | <i>Spline</i>          | P<0.001 |
| Ratio of registered nurses on duty on the weekend per 10 stroke unit beds            | <i>Spline</i>          | P=0.127 |

Table IV: Sensitivity analysis including interaction between ward rounds and NIHSS

|                                                                              | Odds ratio<br>(95% CI) | p-value |
|------------------------------------------------------------------------------|------------------------|---------|
| NIHSS                                                                        | 1.111 (1.107 – 1.115)  | P<0.001 |
| Daily ward rounds:                                                           |                        |         |
| <7-days per week                                                             |                        |         |
| 7-days per week                                                              | 0.827 (0.746 – 0.917)  | P<0.001 |
| Interaction NIHSS and daily ward rounds:                                     | 1.006 (1.002 – 1.011)  | P=0.007 |
| Average annual number of admissions (100s)                                   | <i>Spline</i>          | P=0.161 |
| Ratio of nurses trained in swallow screening<br>per 10 stroke unit beds      | <i>Spline</i>          | P=0.005 |
| Ratio of registered nurses on duty on the<br>weekend per 10 stroke unit beds | <i>Spline</i>          | P=0.127 |

## Supplemental Figures and Figure Legends

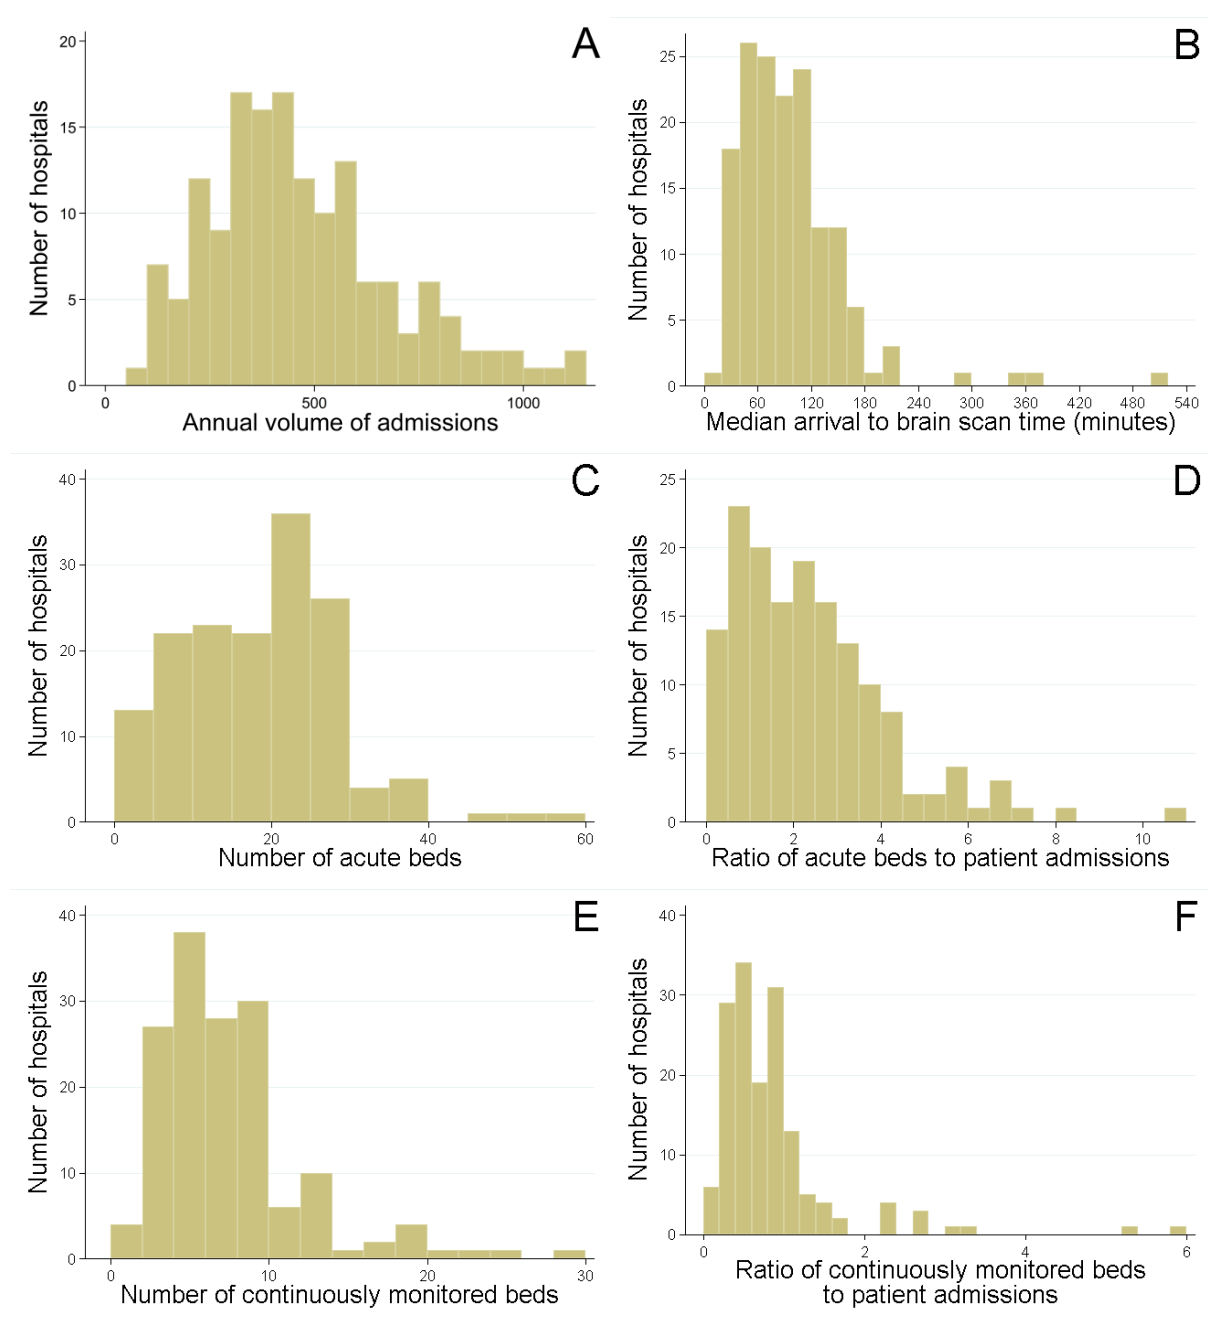

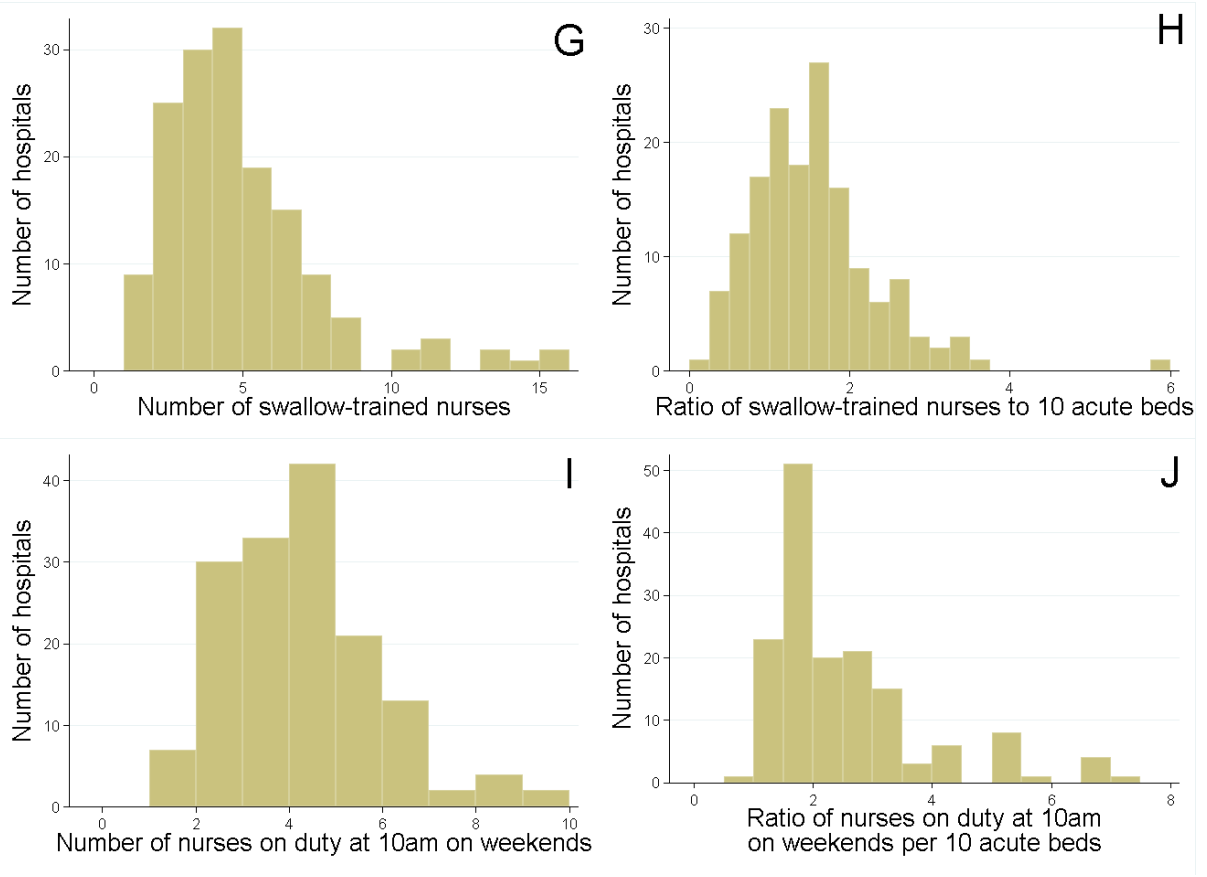

Figure I (A-J): Distributions of hospital-level organisational characteristics

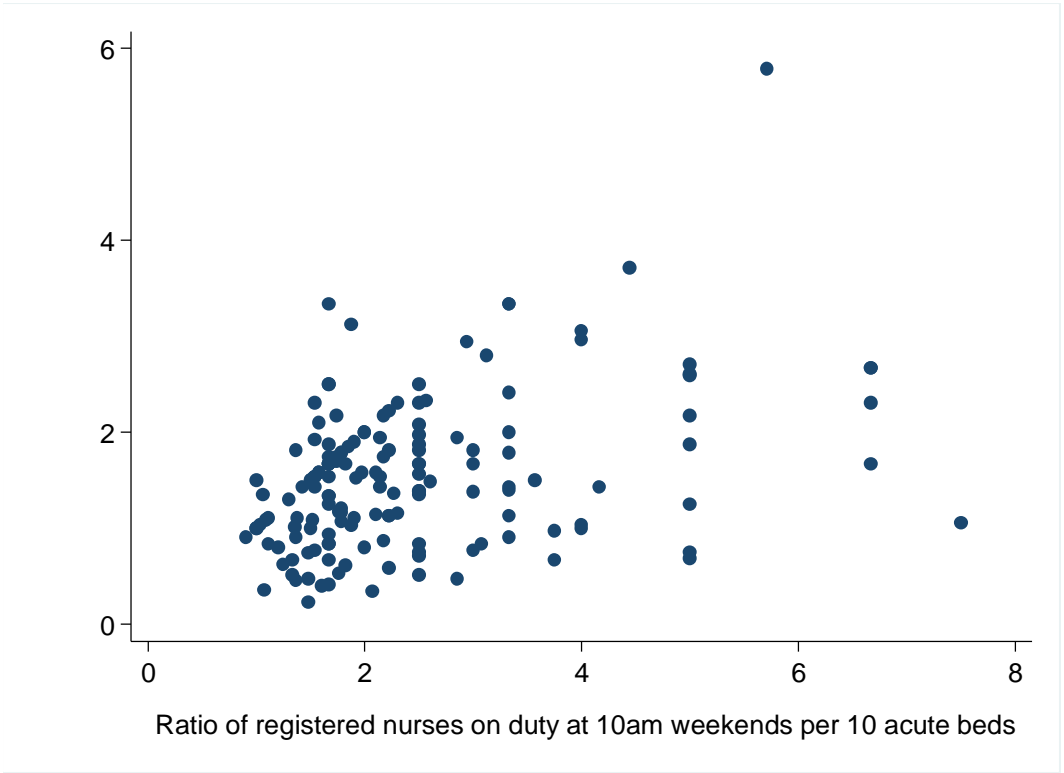

Figure II: Scatter plot for the association between the ratio of registered nurses on duty at 10 am weekends, and the ratio of nurses trained in swallow screening in each hospital

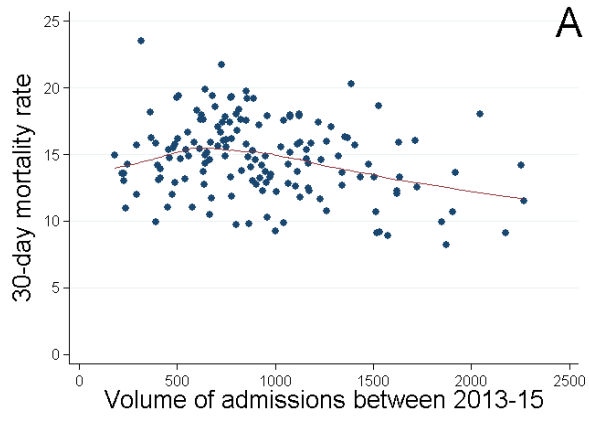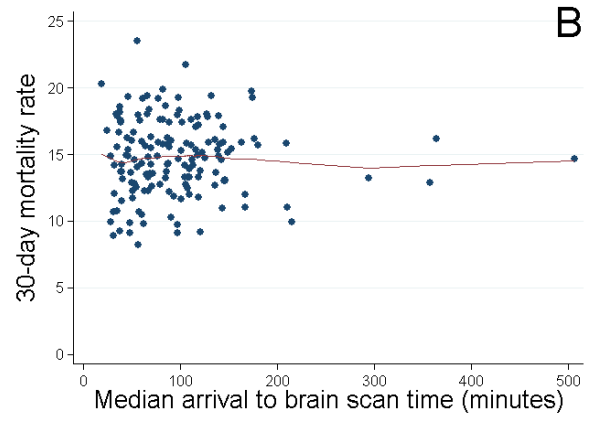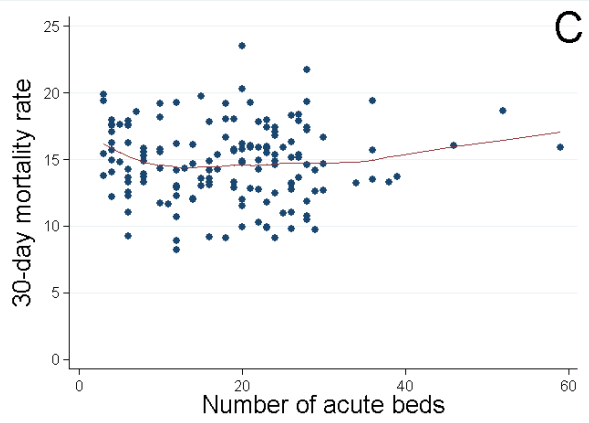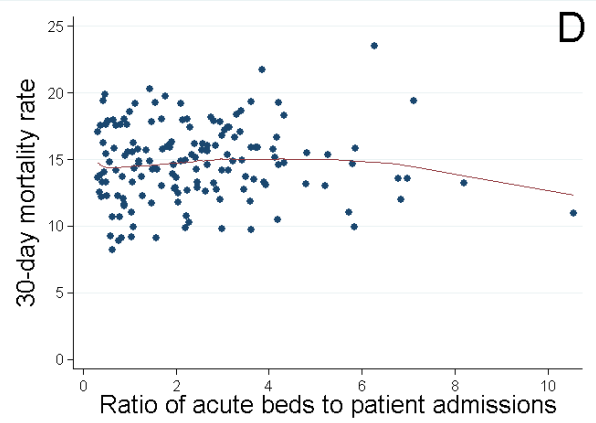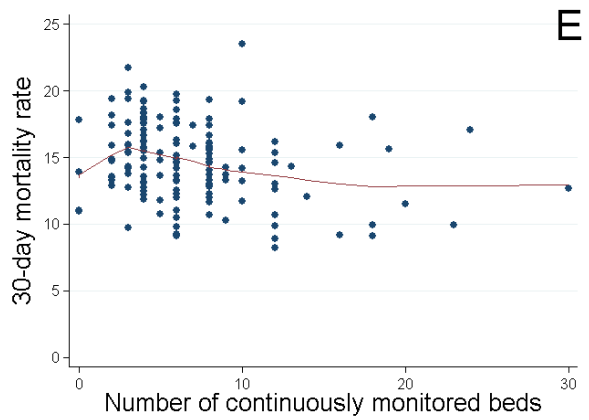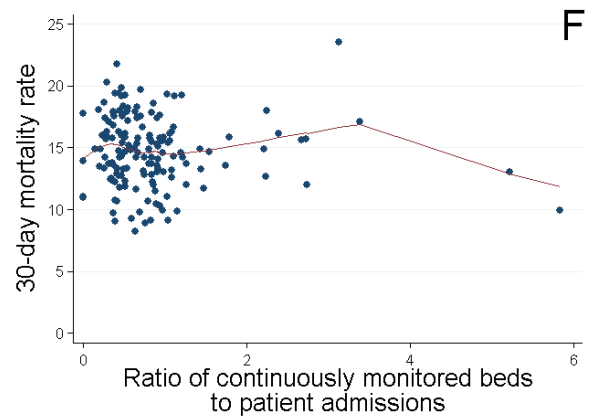



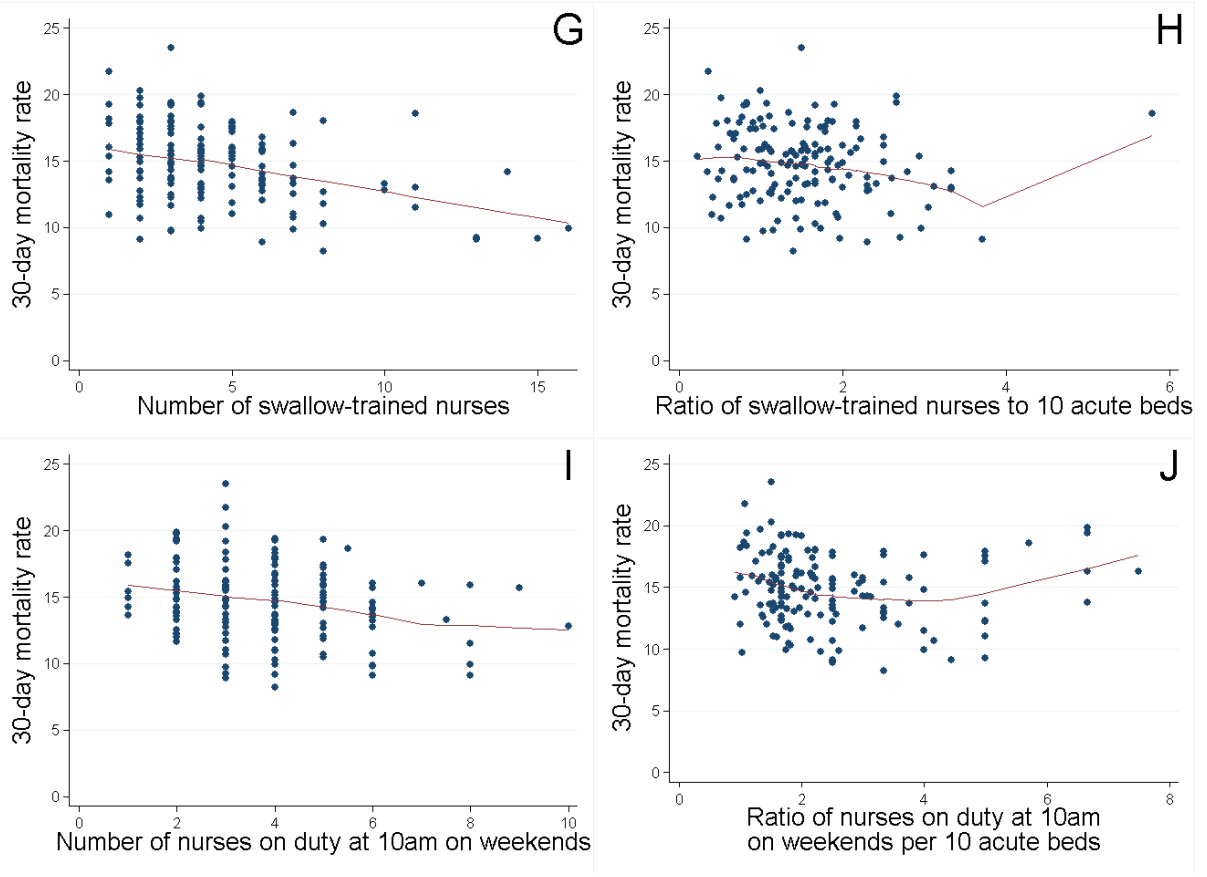

Figure III (A-J): Lowess smoother plots for 30-day mortality rate per hospital for each hospital-level organisational characteristic
